# Supplementary material
Source: PubMed Central journal article supplement (PMC3074454)
Supplement: supp_138.9.1817_DEV056697TableS1.pdf [file supp_138.9.1817_DEV056697TableS1.pdf]

**Table S1. Dose-dependent effects of miR-92 gain of function**

|                     | <i>n</i> | L    | R    | M    | B    | A    |
|---------------------|----------|------|------|------|------|------|
| <b><i>foxa3</i></b> |          |      |      |      |      |      |
| NIC                 | 188      | 98.4 | 1.6  | 0.0  | 0.0  | 0.0  |
| miR-92 200 pg       | 72       | 23.6 | 22.2 | 22.2 | 26.4 | 5.6  |
| miR-92 1 ng         | 37       | 2.7  | 0.0  | 18.9 | 75.7 | 2.7  |
| miR-92 2 ng         | 74       | 0.0  | 0.0  | 14.9 | 70.3 | 14.9 |
| Ctrl miRNA          | 90       | 92.2 | 3.3  | 4.4  | 0.0  | 0.0  |
| <b><i>cmic2</i></b> |          |      |      |      |      |      |
| NIC                 | 103      | 98.1 | 1.0  | 1.0  | 0.0  | –    |
| miR-92 200 pg       | 67       | 11.9 | 4.5  | 38.8 | 44.8 | –    |
| miR-92 1 ng         | 98       | 0.0  | 0.0  | 14.3 | 85.7 | –    |
| Ctrl miRNA          | 53       | 98.1 | 1.9  | 0.0  | 0.0  | –    |

Percentages of left (L), right (R), midline (M) and bilateral (B) localization of *foxa3* or *cmic2* in non-injected controls (NIC), miR-92-injected and control miRNA-injected embryos. Occasionally, no *foxa3* was detected (A, absent).

*n*, the total number of embryos analyzed in each condition.
