# Supplementary material
Source: PubMed Central journal article supplement (PMC3074454)
Supplement: supp_138.9.1817_DEV056697TableS2.pdf [file supp_138.9.1817_DEV056697TableS2.pdf]

**Table S2. Dose-dependent effects of miR-92 loss of function**

| <i>foxa3</i> | <i>n</i> | L     | R    | M    |
|--------------|----------|-------|------|------|
| NIC          | 188      | 98.4  | 1.6  | 0.0  |
| MO1 400 pg   | 10       | 100.0 | 0.0  | 0.0  |
| MO1 1 ng     | 59       | 94.9  | 3.4  | 1.7  |
| MO1 2 ng     | 55       | 60.0  | 14.5 | 25.5 |
| MO1 4 ng     | 35       | 57.1  | 22.9 | 20.0 |
| MO2 1.5 ng   | 59       | 88.1  | 11.9 | 0.0  |
| MO2 3 ng     | 49       | 98.0  | 2.0  | 0.0  |
| MO2 6 ng     | 48       | 87.5  | 8.3  | 4.2  |
| MO2 9 ng     | 15       | 80.0  | 6.7  | 13.3 |
| MO1+2        | 126      | 59.5  | 17.5 | 23.0 |
| Ctrl MO      | 56       | 94.6  | 5.4  | 0.0  |

Percentages of left (L), right (R) and midline (M) localized *foxa3* in non-injected controls (NIC), miR-92 MO-injected and control MO-injected embryos.

*n*, the total number of embryos analyzed in each condition.
