# Supplementary material
Source: PubMed Central journal article supplement (PMC3074454)

*cas* 90% epiboly

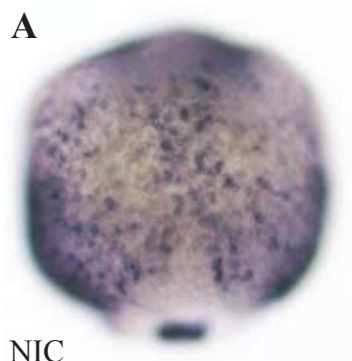

*cas* 90% epiboly

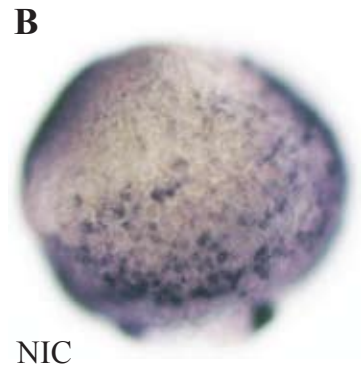

*ntl* 70% epiboly

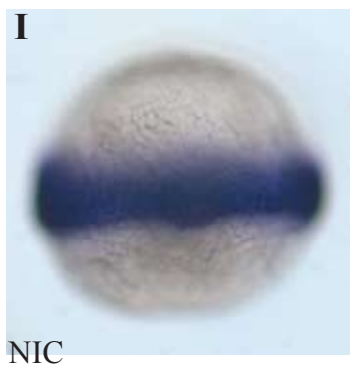

*ntl* tail bud

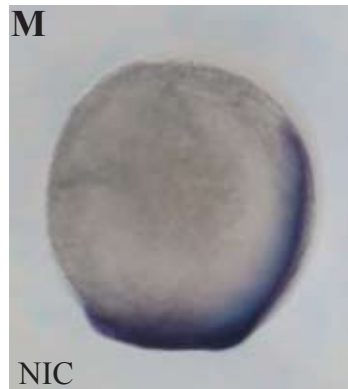

**C**

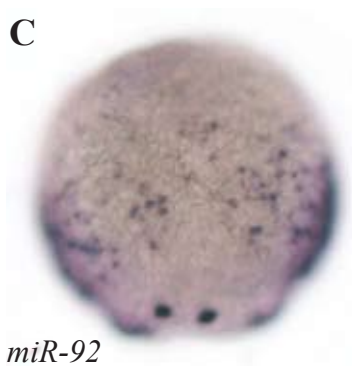

**D**

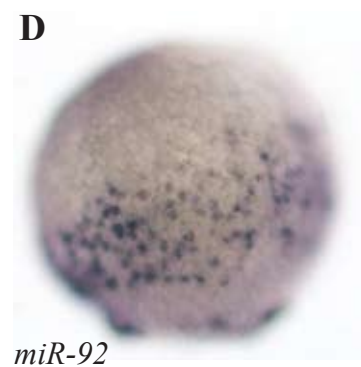

**J**

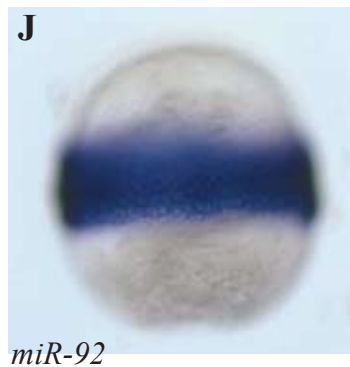

**N**

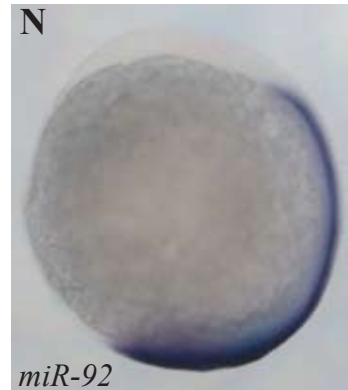

**E**

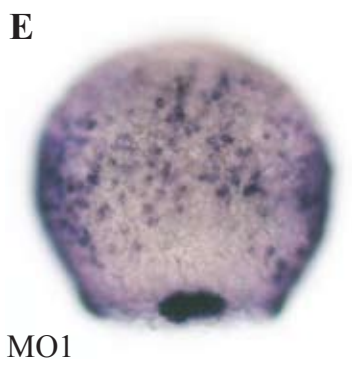

**F**

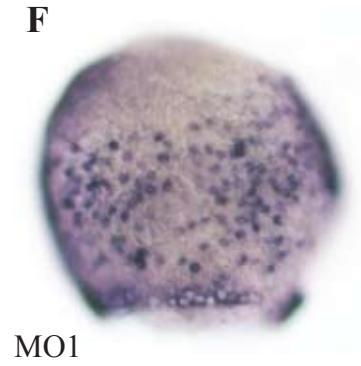

**K**

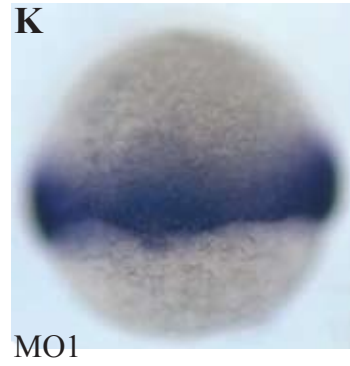

**O**

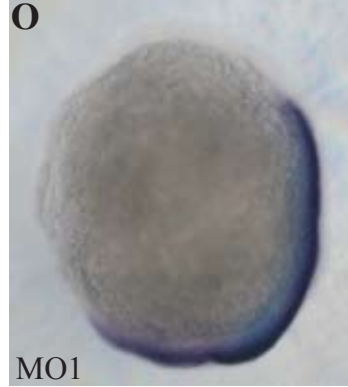

**G**

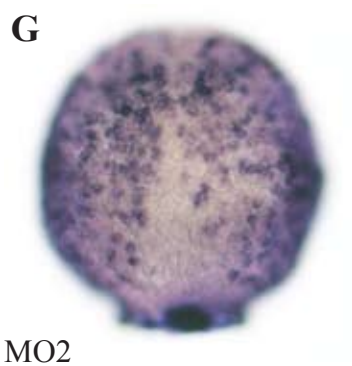

**H**

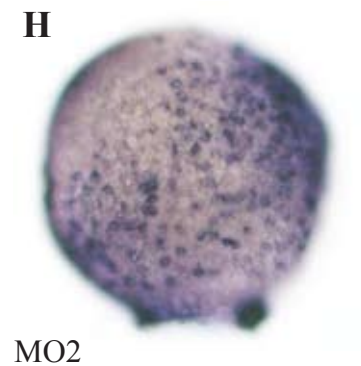

**L**

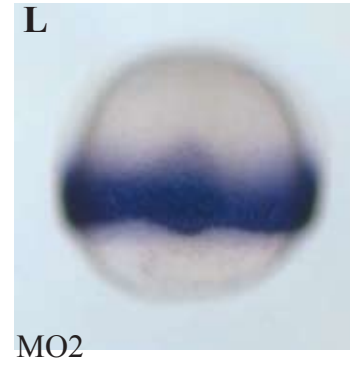

**P**

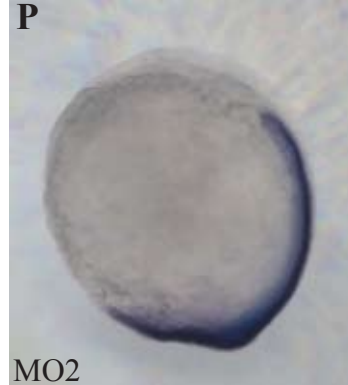

Supplement: supp_138.9.1817_DEV056697FigS1.pdf [file supp_138.9.1817_DEV056697FigS1.pdf]

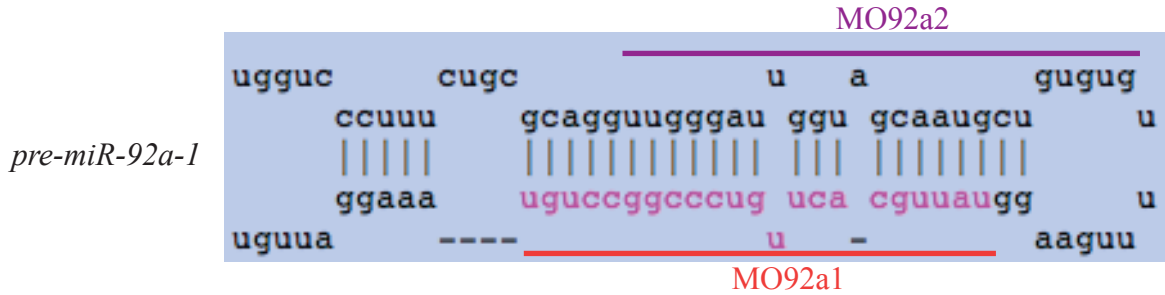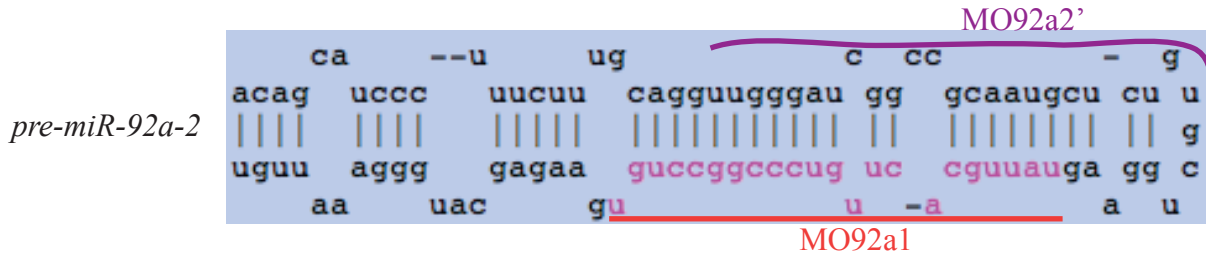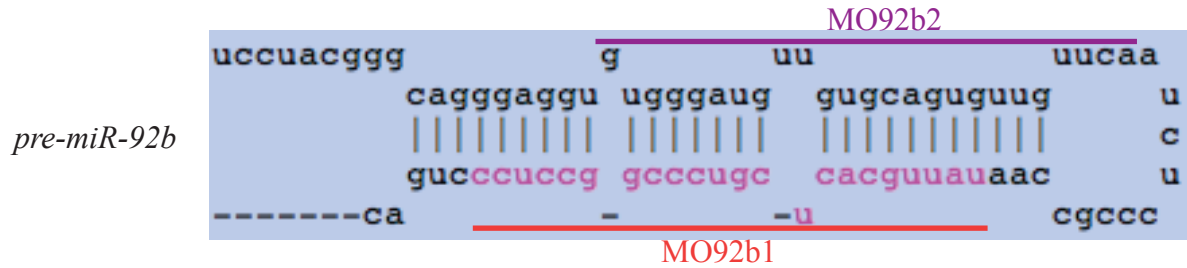

MO1=MO92a1+MO92b1

MO2=MO92a2+MO92a2'+MO92b2

Supplement: supp_138.9.1817_DEV056697FigS2.pdf [file supp_138.9.1817_DEV056697FigS2.pdf]

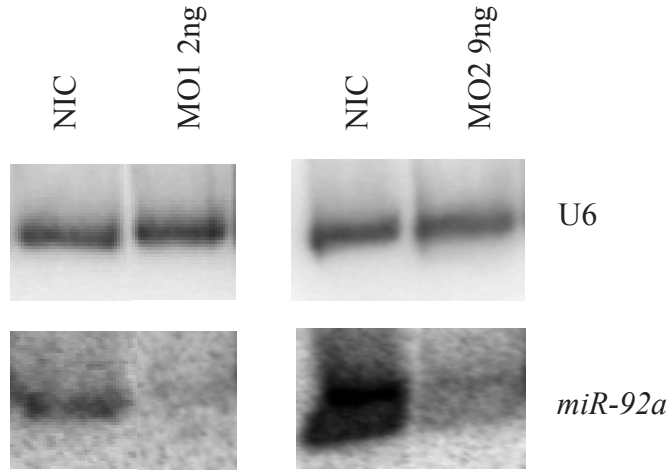

Supplement: supp_138.9.1817_DEV056697FigS3.pdf [file supp_138.9.1817_DEV056697FigS3.pdf]

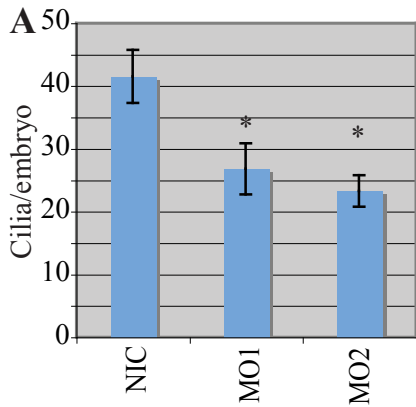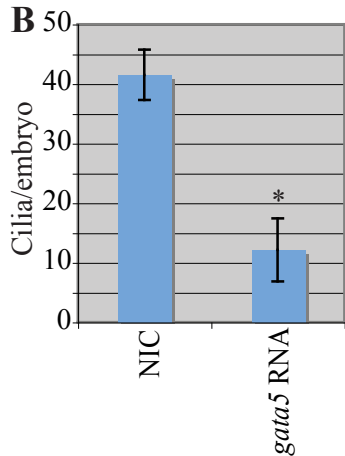

Supplement: supp_138.9.1817_DEV056697FigS4.pdf [file supp_138.9.1817_DEV056697FigS4.pdf]

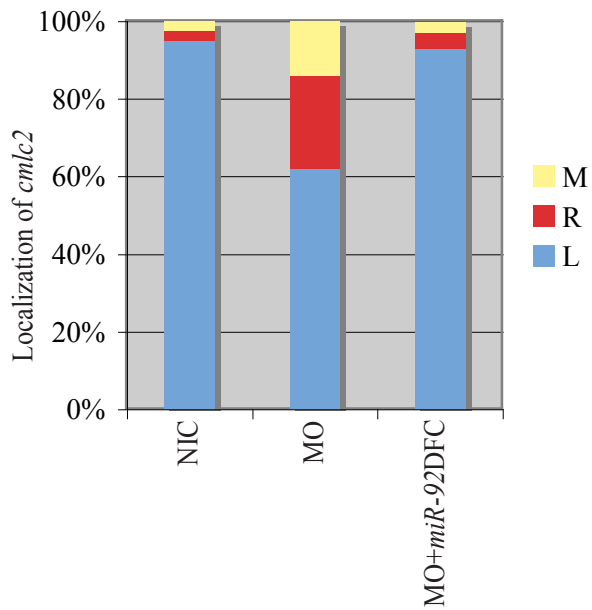

Supplement: supp_138.9.1817_DEV056697FigS5.pdf [file supp_138.9.1817_DEV056697FigS5.pdf]

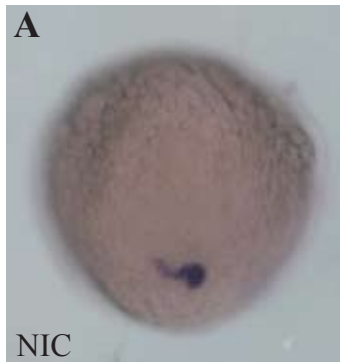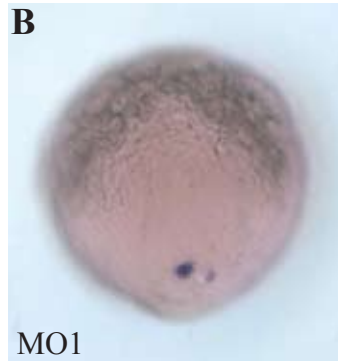

*lrd* 90% epiboly

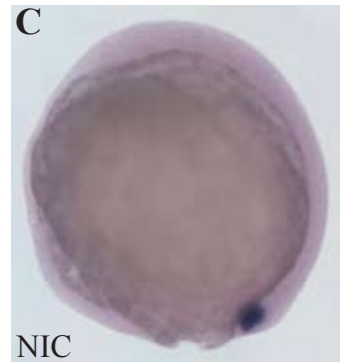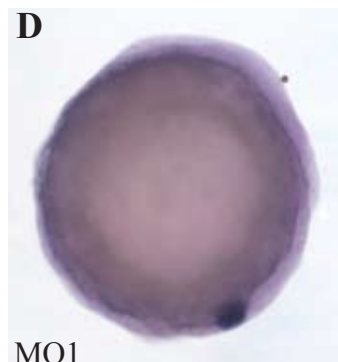

*foxj1* 100% epiboly

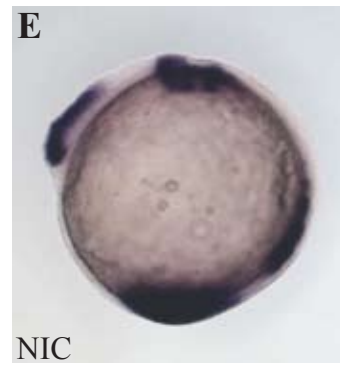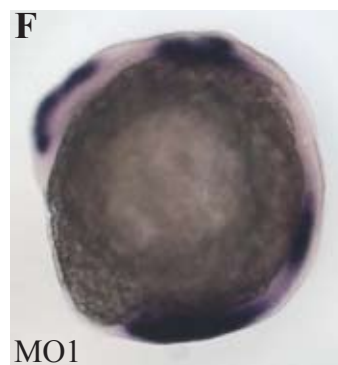

*fgf8* 6-somite

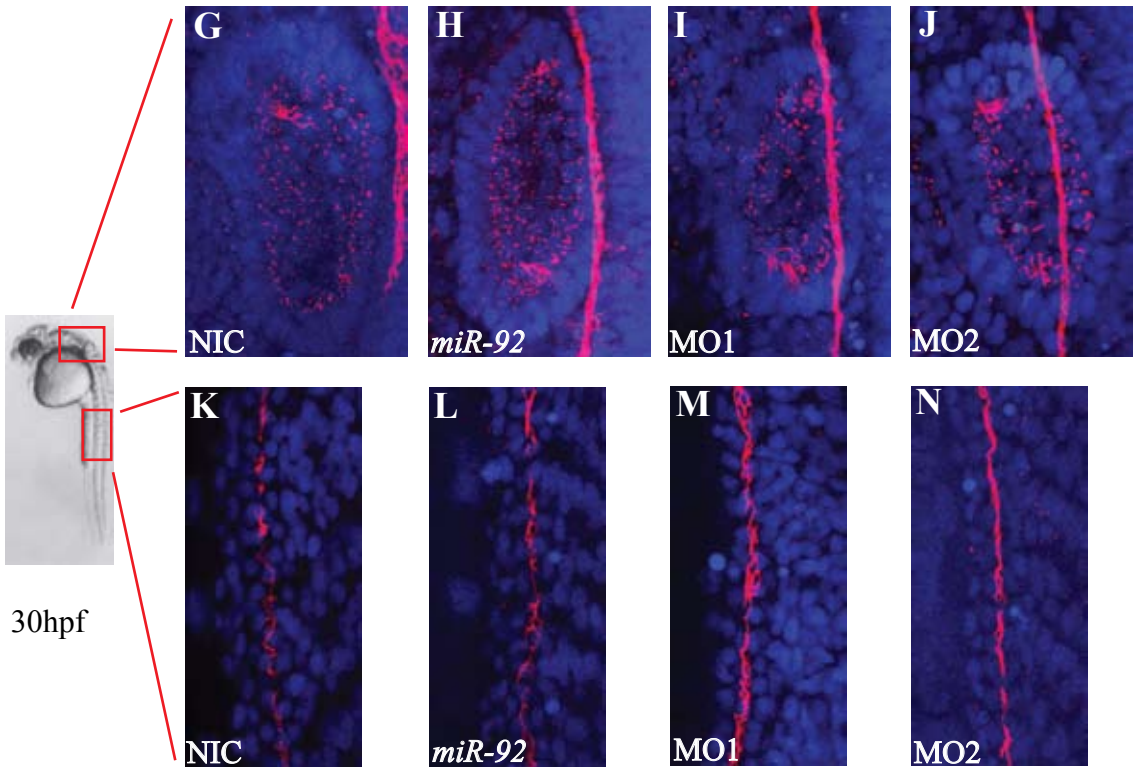

Acetylated Tubulin(cilia) SYTO59(nucleus)

Supplement: supp_138.9.1817_DEV056697FigS6.pdf [file supp_138.9.1817_DEV056697FigS6.pdf]

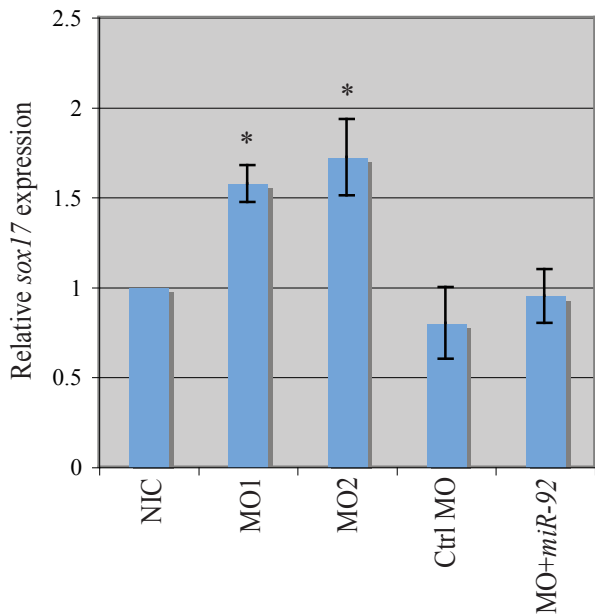

Supplement: supp_138.9.1817_DEV056697FigS7.pdf [file supp_138.9.1817_DEV056697FigS7.pdf]
